# Supplementary material
Source: Springer Nature journal article supplement (https://www.springermedizin.de/resource/supplementary/12913_2012_2803_MOESM3_ESM.pdf/9531386)
Supplement: MOESM3 [file 9531386]

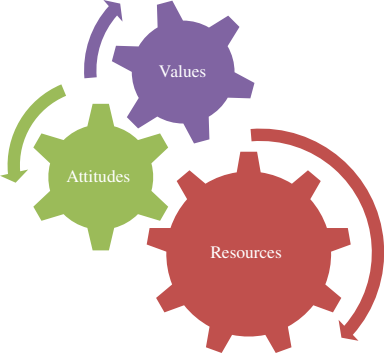

How do the **values**, beliefs, and culture of system actors interface with the accountability mechanism? How does the system and accountability mechanism interface with the values and beliefs of citizens and patients?

How do the **attitudes** and perceptions of providers, managers, bureaucrats and policymakers interface with the accountability mechanism? How does the system and accountability mechanism interface with the attitudes and perceptions of citizens and patients?

How do **resources** and capacities in the system interface with the accountability mechanism? How does the system and accountability mechanism fit with the resources and capacities of citizens and patients?
